# Supplementary material for: Prophage induction mediated by quorum sensing signals alters soil bacterial community structure
Source: bioRxiv or medRxiv preprint supplement (doi:10.1101/805069), 2019-10-16
Supplement: Supplementary file [file media-1.pdf]

# Supplementary information

## **Prophage induction mediated by quorum sensing signals alters soil bacterial community structure**

Xiaolong Liang<sup>a</sup>, Regan E. Wagner<sup>a</sup>, Bingxue Li<sup>b</sup>, Ning Zhang<sup>b</sup>, and Mark Radosevich<sup>a\*</sup>

*<sup>a</sup>Department of Biosystems Engineering and Soil Science, The University of Tennessee, Knoxville, TN 37996, United States*

*<sup>b</sup>College of Land and Environment, Shenyang Agricultural University, Shenyang, Liaoning, China*

*<sup>c</sup>College of Biotechnology, Shenyang Agricultural University, Shenyang, Liaoning, China*

\*Corresponding author: Mark Radosevich (mradosev@utk.edu)

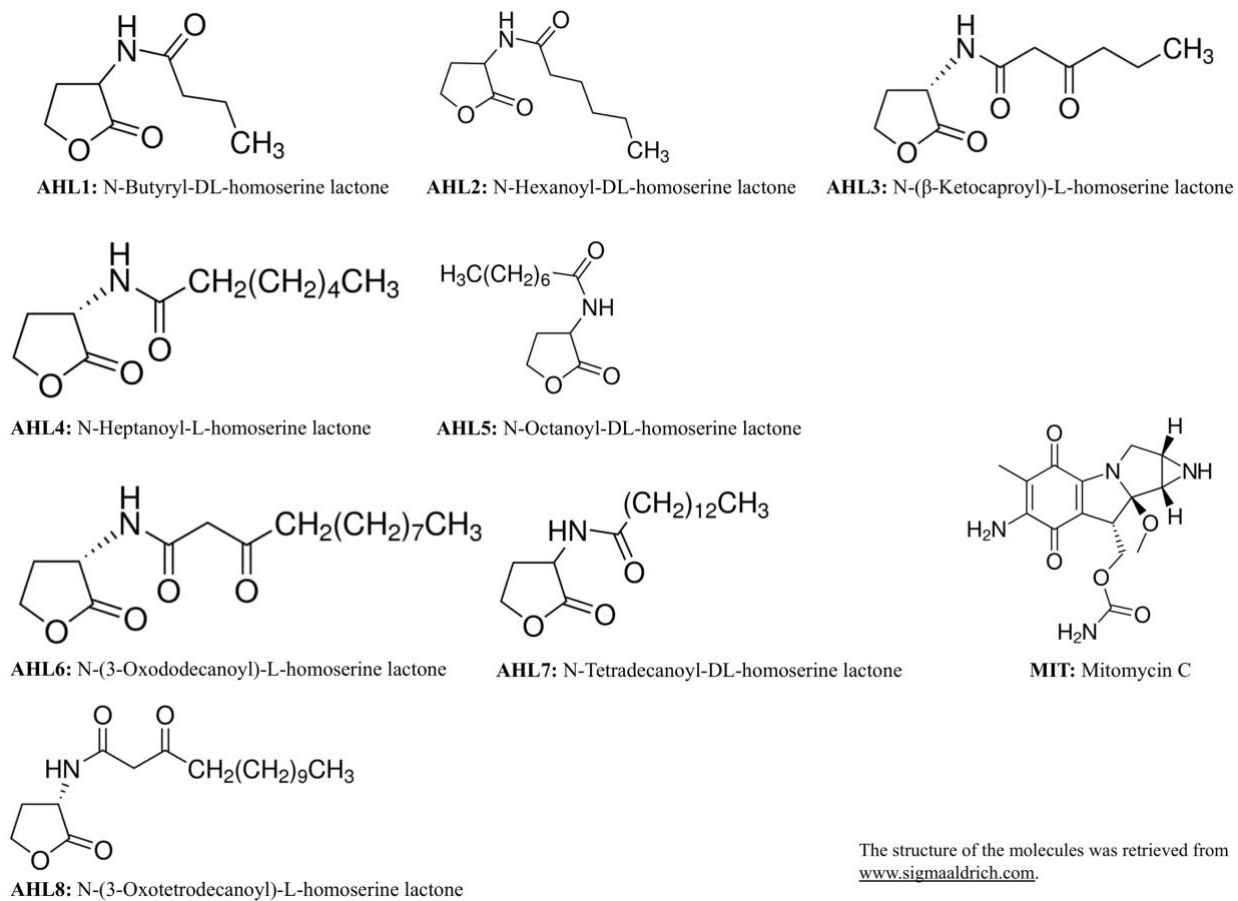

**Figure S1.** The molecular structure of quorum-sensing N-Acyl homoserine lactones (AHL1–8) and mitomycin C (MIT).

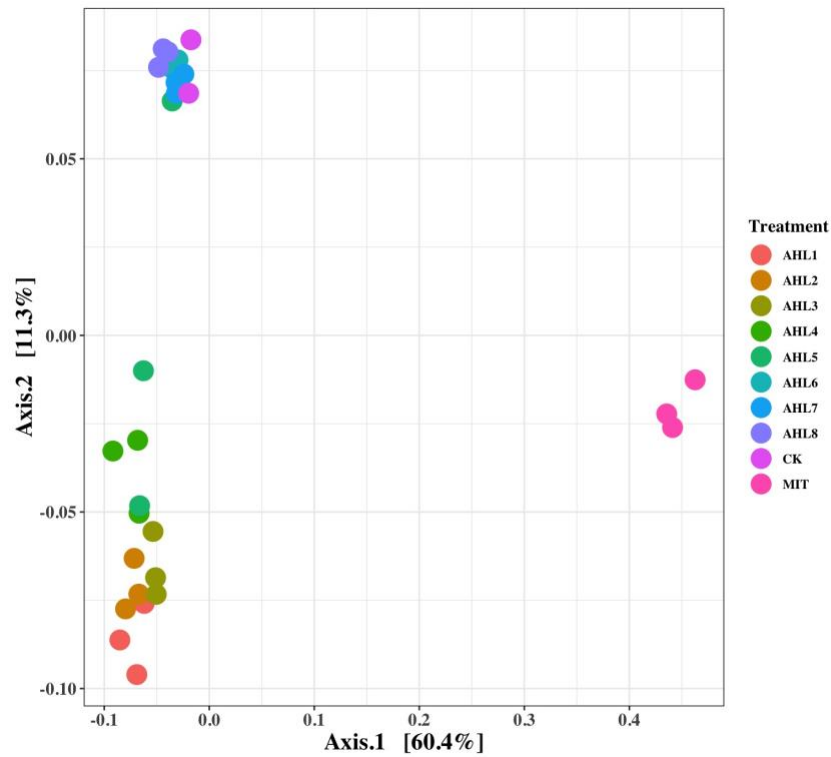

**Fig. S2** Principal coordinate analysis (PCoA) of bacterial community composition. Treatments, including induction assays of mitomycin C (MIT), N-(Butyryl, Hexanoyl,  $\beta$ -Ketocaproyl, Heptanoyl, Octanoyl, 3-Oxododecanoyl, Tetradecanoyl, and 3-Oxotetradecanoyl) homoserine lactones (represented by AHL1–8, respectively), and the control (CK) are color-coded.

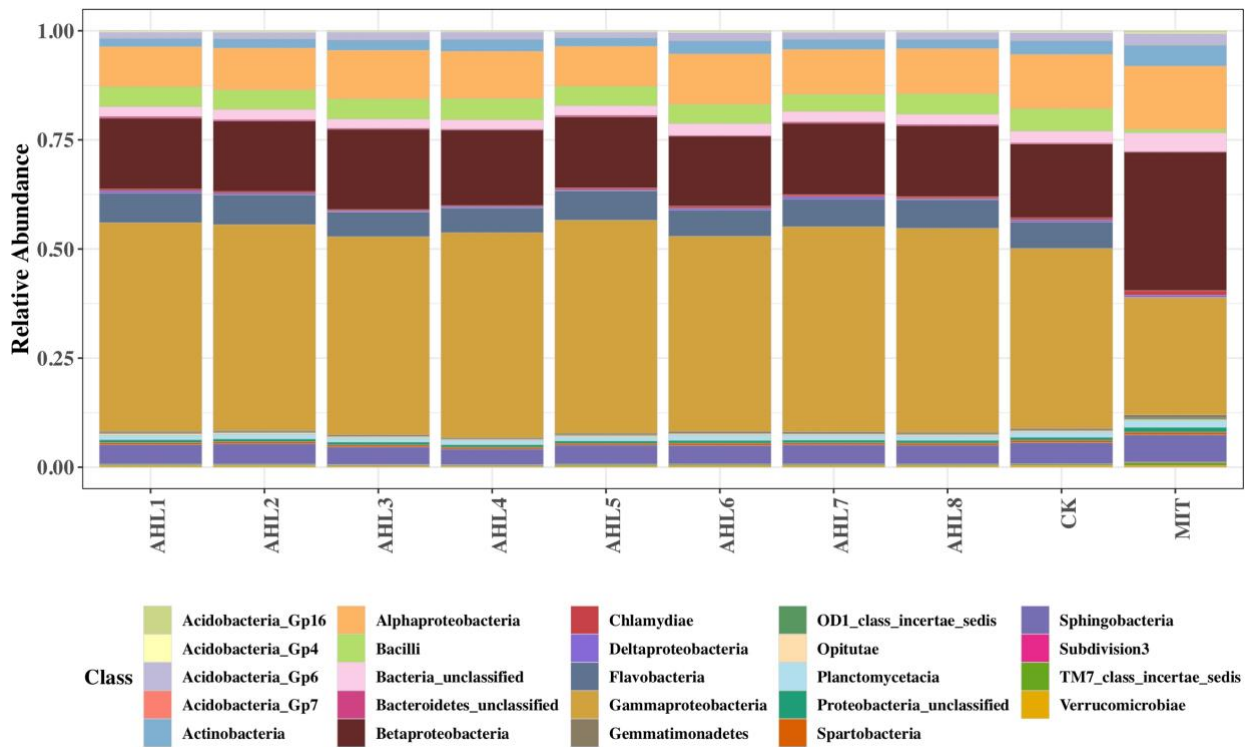

**Fig. S3** Bacterial community composition at Class level. Treatments include induction assays of mitomycin C (MIT), N-(Butyryl, Hexanoyl,  $\beta$ -Ketocaproyl, Heptanoyl, Octanoyl, 3-Oxododecanoyl, Tetradecanoyl, and 3-Oxotetradecanoyl) homoserine lactones (represented with AHL1–8, respectively), and the control (CK).
